1 **A Qualitative Study on Food Taboos Among Rural Pregnant**  
2 **Women in Bangladesh: Motivators for Adherence and**  
3 **Influencers of Taboo-Breaking Behavior**

4 Shahrin Emdad Rayna<sup>1</sup>, Fahmida Afroz Khan<sup>1</sup>, Sharraf Samin<sup>1</sup>, Saiqa Siraj<sup>2</sup>, Saika Nizam<sup>3</sup>, Syed  
5 Shariful Islam<sup>1</sup>, Md. Khalequzzaman<sup>1\*</sup>

6  
7 <sup>1</sup> Department of Public Health and Informatics, Bangabandhu Sheikh Mujib Medical University,  
8 Shahbag, Dhaka, Bangladesh

9 <sup>2</sup> Nutrition International, Bangladesh Office, Gulshan-2, Dhaka, Bangladesh

10 <sup>3</sup> Department of Occupational and Environmental Health, Bangladesh University of Health  
11 Sciences, Mirpur, Dhaka, Bangladesh

12  
13 **\* Corresponding author**

14 E-mail: [zaman.dphi@bsmmu.edu.bd](mailto:zaman.dphi@bsmmu.edu.bd), [romenraihan@yahoo.com](mailto:romenraihan@yahoo.com)

15

16

17

18

19

20

21

22

## 23 **Abstract**

24 Understanding the influence of cultural practices on maternal health is crucial in addressing the  
25 nutritional challenges faced by pregnant women in rural Bangladesh. Despite significant  
26 improvements in maternal and child health indicators, food taboos remain prevalent, impacting  
27 the nutritional well-being and health outcomes of vulnerable populations. This study explored  
28 food taboos and factors related to their adherence or violation, among rural pregnant women in  
29 four districts of Bangladesh: Habiganj, Bhola, Rajshahi, and Cumilla. A qualitative cross-  
30 sectional study was conducted with 90 participants through 29 in-depth interviews and 11 focus  
31 group discussions. Participants included 21 pregnant women, 23 mothers-in-law, 20 husbands,  
32 and 26 healthcare workers. The data were thematically coded and the narrative was analyzed. All  
33 participants identified at least one food item restricted by family elders, often based on beliefs  
34 about the negative effects of certain foods on pregnancy and the baby's health. Commonly  
35 restricted animal source foods included white carp, trout, duck meat, and mutton, due to fears of  
36 convulsions, speech disorders, or undesirable traits in the baby. Raw papayas and pineapples  
37 were avoided due to beliefs they could cause miscarriage. Adherence to these taboos was related  
38 to the pregnant mother's preference for vaginal delivery, desire to avoid harm to her child, and  
39 profound respect for her elders. Factors enabling the breaking of food taboos included nutritional  
40 counseling by health care workers, increased family understanding of maternal nutrition, reduced  
41 reinforcement of taboos, and the lack of negative consequences from consuming tabooed foods.  
42 The findings highlight the importance of utilizing scientific evidence to challenge food taboos by  
43 developing new strategies or updating community-based nutritional counseling programs.  
44 Furthermore, including family members and community elders in these efforts is crucial for  
45 creating a conducive environment that facilitates dietary changes for pregnant women.

46 **Key words**

47 Food taboos

48 Pregnant women

49 Nutritional counselling

50 Adherence

51 Bangladesh

52 **Introduction**

53 Existing food taboos in the community are particularly associated with women and their special  
54 events in life, such as menarche, marriage, pregnancy, childbirth, lactation, et cetera [1]. In most  
55 communities' food restrictions are generally imposed during childbirth and early lactation period  
56 of a woman, which usually do not comply with the modern biomedical concepts regarding the  
57 proper types and amount of food that pregnant women need to assure optimal maternal nutrition  
58 [2]. This ultimately results in suboptimal dietary practices of the pregnant, leading to a state of  
59 biological competition between the mother and the fetus in which the well-being of both is at  
60 serious risk [3]. Maternal undernutrition is a major public health and development concern in  
61 Bangladesh because more than half of the pregnant women in rural Bangladesh, had reduced  
62 dietary intake during their pregnancy [4] and the identified reasons behind them were, presence  
63 of local beliefs regarding food taboos during pregnancy which was deeply entrenched in the  
64 culture of the community, widely practiced, and often their importance were reinforced by the  
65 mothers-in-law and elders of the family [4]. Mentally and physically abnormal child, different  
66 kinds of illness of the child, and threat of abortion were among the primary reasons for

67 misbeliefs about the tabooed foods [5]. Even though food taboo and their practices are rampant  
68 in Bangladesh, very few papers had documented these taboos and the motivations behind them.  
69 Using qualitative data from the rural regions of Bangladesh, this study has compiled a  
70 comprehensive list of various food taboos practiced, along with the motivators for adherence to  
71 the taboos, and a few crucial stimulators in breaking the food taboos.

## 72 **Methods**

### 73 **Programmatic context**

74 The results presented in this paper are part of a formative research initiative taken up by  
75 Nutritional International, aimed at informing the development of behavior change interventions  
76 to improve the nutritional status of pregnant women in selected districts of Bangladesh. This  
77 research contributes to the strategic planning of behavior change programs by identifying key  
78 factors influencing dietary behaviors, habits and food taboos, in rural communities. Insights  
79 gathered from this study was utilized to create a comprehensive Behavior Change Intervention  
80 (BCI) strategy that promotes positive nutritional behaviors among pregnant women. By  
81 understanding the motivations behind adherence to food taboos and identifying the influencers of  
82 taboo-breaking behavior, this study lays the groundwork for developing culturally sensitive,  
83 community-based interventions to improve maternal nutrition and health outcomes in  
84 Bangladesh.

### 85 **Study type, population and sampling techniques**

86 The initial part of the formative research was an exploratory cross-sectional study using  
87 qualitative methods, conducted in four selected districts of Bangladesh named Habiganj, Bhola,

88 Rajshahi and Cumilla (sites where Nutrition International had existing programs). From each of  
89 the district, a random upazila (sub-district) was chosen for participant selection. The study  
90 population consisted of pregnant women, husbands, mothers-in-law and health care workers  
91 (HCWs) operating at the community level. Recruitment for this study began from June 04, 2017  
92 and concluded in March 15, 2018. The pregnant women were identified from the registers of all  
93 enlisted pregnant women kept by the community clinics (lowest tier of basic health service  
94 facilities in Bangladesh) and enrolled for in-depth interviews (IDIs). Husbands and mothers-in-  
95 law of pregnant women who were not the family members of the participating pregnant women,  
96 were invited to participate in focus group discussions (FGDs). HCWs who were responsible for  
97 providing care for pregnant women (health assistants [HA], family welfare visitors [FWVs] and  
98 family planning inspectors [FPIs]), were identified and invited to participate, based on their  
99 availability.

100 A total of 109 participants were selected purposively to represent the four upazilas. The  
101 maximum variation technique was employed for the selection of the participants, to ensure the  
102 diversity of the study subjects with regards to age, socio-economic status, pregnancy status,  
103 gestational age and sex [2].

## 104 **Data collection procedure**

105 Data were collected using IDIs with pregnant women and HCWs to explore the existing food  
106 taboos and understand their reasoning for adhering to it or breaking it. FGDs were conducted  
107 separately among groups of husbands and mothers-in-law, to understand the factors which  
108 influenced the pregnant women to accept the taboos, and how they were being motivated to  
109 break free from the taboos to ensure optimal maternal nutritional practices. In each FGD, 4-6  
110 participants were included which is considered to be an ideal sample size for such qualitative

111 interviews [6]. Sex-specific groupings were done to remove any male influence over the  
112 discussions. An interview guideline was developed to conduct the interviews in a systematic and  
113 semi-structured manner. It helped the interviewers to guide the conversations around the existing  
114 dietary taboos during pregnancy, and the dynamics of the individual, societal and/or  
115 environmental factors influencing it. The qualitative guideline was initially pre-tested in an  
116 upazila, close to Dhaka but with similar socio-demographic profiles of our study areas. Based on  
117 the findings and consultation with the research team, the questions were modified to reflect  
118 literacy levels and cultural interpretations. The IDIs and FGDs were conducted in Bangla by the  
119 field team following an interview guideline. Field notes were taken by one of the research  
120 assistants, to note down the observations of the surrounding environment while conducting the  
121 interview, and any non-verbal reactions to the questions/discussions, which were used in analysis  
122 later. To minimize the possibilities for misinterpretation of the participant narratives, extensive  
123 discussions with the research assistants and field supervisors were held at the end of data  
124 collection to compare notes, discuss findings and to clarify local language and meanings where  
125 necessary.

## 126 **Data analysis**

127 All the interviews were audio recorded, which was followed by verbatim transcriptions of the  
128 interviews, and then translated into English. In order to ensure the consistency of the translation  
129 with the original, the researchers double checked the audio with the verbatim and translated  
130 materials, to avoid any errors. Thematic analysis was utilized to manually analyze the textual  
131 data (i.e.—no textual software was used e.g. Atlas-ti or Nvivo) [7].Open codes were generated,  
132 which was followed by coding of the data by reading and re-reading all the transcripts. After  
133 completing the initial coding of the interviews, codes were collated under potential themes.

134 Some sections of the interviews were quoted verbatim, and some were modified to enhance  
135 readability. The validity and refinement of the themes and its contents were performed after  
136 reaching a consensus with the authors and the research team.

## 137 **Ethical considerations**

138 This study was conducted according to the guidelines laid down in the Declaration of Helsinki  
139 and all procedures involving research study participants were approved by the Institutional  
140 Review Board of Bangabandhu Sheikh Mujib Medical University, Dhaka, Bangladesh  
141 (BSMMU/2017/3281). All participants provided written informed consent before the interviews  
142 began. Utmost care was taken to ensure the comfort of the pregnant women and their children by  
143 the data collectors. Sensitive questions or issues were dealt very carefully without hurting the  
144 sentiments of the participant and their family. All the members of the data collection team and  
145 analysis team cautiously maintained the confidentiality and anonymity of the participants  
146 throughout the study.

## 147 **Results**

148 A total number of 29 IDIs and 11 FGDs were conducted (Table 1). Among them, there were 21  
149 pregnant women, 23 mothers-in-law, 20 husbands and 26 HCWs.

150 **Table 1: Interview methods used and sample size**

| <b>Methods</b>      | <b>Type of Participants</b> | <b>Number of<br/>interviews</b> | <b>Number of<br/>participants</b> |
|---------------------|-----------------------------|---------------------------------|-----------------------------------|
| In-depth interviews | Pregnant women              | 21                              | 21                                |

|                        |                     |   |    |
|------------------------|---------------------|---|----|
|                        | Health care workers | 8 | 8  |
| Focus group discussion | Mothers-in-law      | 4 | 23 |
|                        | Husbands            | 4 | 20 |
|                        | Health care workers | 3 | 18 |

151

152 The mean age of the pregnant women who participated in this study was  $24.35 \pm 5.0$  years, and  
 153 their mean age during marriage was  $16.48 \pm 2.3$  years. Majority of the pregnant women (61.9%)  
 154 had completed only until primary education and were homemakers (85.7%).

155 **Table 2: Demographic profile of the pregnant women (n=21)**

| Variables                                   | Frequency Distributions |       |
|---------------------------------------------|-------------------------|-------|
|                                             | (n)                     | (%)   |
| Age in years (Mean $\pm$ SD)                | $24.35 \pm 5.0$         |       |
| Age at marriage in years<br>(Mean $\pm$ SD) | $16.48 \pm 2.3$         |       |
| <b>Religion</b>                             |                         |       |
| Islam                                       | 20                      | 95.23 |
| Hinduism                                    | 1                       | 4.76  |
| <b>Education</b>                            |                         |       |
| No formal education                         | 4                       | 19    |
| Up to primary level                         | 13                      | 61.9  |
| Up to secondary level                       | 2                       | 9.5   |
| Higher secondary or above                   | 2                       | 9.5   |



---

|     |                        |    |      |
|-----|------------------------|----|------|
| 156 | Occupation             |    |      |
|     | Housewife              | 18 | 85.7 |
|     | Student                | 1  | 4.8  |
|     | Service holder*        | 2  | 9.52 |
|     | No. of living children |    |      |
|     | 0                      | 7  | 33.3 |
|     | 1                      | 8  | 38.1 |
|     | ≥2                     | 6  | 28.6 |

---

157 \*Service holder includes school teacher, NGO community worker

158 The various themes which emerged from the interviews and discussions are presented and  
159 discussed below.

## 160 **Food taboos during pregnancy**

161 Food taboos practiced by the rural women were classified into three groups: animal source foods,  
162 vegetables and fruits, and other items. All the participants mentioned at least one food item  
163 which was not allowed by her elders or other family members, and many of them modified their  
164 diet or eating habits at various levels during pregnancy based on the food taboos.

### 165 **Animal source foods**

166 The current study revealed that majority of the women were prohibited to eat varieties of animal  
167 source foods, among which different types of fishes were the most mentioned. The frequently  
168 voiced fish was the white carp (locally called in Bangla *Mrigel maach*), which was avoided by  
169 almost all pregnant women because it was believed to cause convulsion/ epilepsy of the child  
170 (*mrigi rog*).

171 “...all the pregnant women in this community avoid white carp (*Mrigel maach*), it  
172 is said that this fish causes convulsions of the child...who wants to see that  
173 happen to their child? No one!” – IDI, pregnant woman, Cumilla

174 Additionally consumption of trout fish, yellowtail catfish were also restricted as they were  
175 believed to cause convulsions of the baby. The participants from Cumilla mentioned avoiding the  
176 zigzag eel (*Baim maach*), as they believed it caused increased fetal movements in their womb;  
177 i.e., the baby keeps rolling and twisting in their tummy leading to discomfort of the mother.  
178 Similarly, participants from Bhola mentioned avoiding white carp, trout fish, yellowtail catfish  
179 for the obvious reasons, but they also included swamp barb (*Puti maach*) and wallago attu (*Boal*  
180 *maach*) in their list. Intake of the swamp barb was thought to cause insufficient breast milk  
181 production after delivery, whereas eating wallago attu would cause the baby’s mouth to resemble  
182 like that of the fish.

183 Among other animal source foods, duck meat and mutton were specifically restricted for women  
184 living in Cumilla and Bhola regions. Duck meat was avoided as it was believed to cause speech  
185 disorders (stuttering) or changes in the voice quality (harsh voice like duck) of the baby.  
186 Likewise, eating mutton during pregnancy might result in the baby having a bad smell or body  
187 odour (*botka gondho*).

188 “...my mother-in-law told me not to feed duck meat... apparently if you consume  
189 duck meat then the baby’s voice breaks, the voice is not of good quality”- FGD,  
190 mothers-in-law, Cumilla

191 “... some women don’t want to eat mutton, and when I asked them why... they  
192 say that the meat has a stench, and it is believed that when the child grows up,  
193 also smells foul.” – IDI, HCW, Cumilla

## 194 **Fruits and Vegetables**

195 Fruits and vegetables were the most consumed food items by all the pregnant women because it  
196 was inexpensive and widely available. Yet, raw papayas and pineapples were named as restricted  
197 food items because they were reported to cause miscarriage. Some respondents also mentioned  
198 that consuming raw papayas will result the baby’s skin to crack (*fata*), and if pineapple is  
199 consumed it will turn the baby’s hair red.

200 “...one shouldn’t feed pregnant women raw papayas... some say you lose the  
201 baby...” –FGD, mothers-in-law, Bhola

202 “raw papayas we always eat it cooked...if not child is born cracked... once my  
203 daughter-in-law ate raw papayas in front of me, I was very afraid for her then...”

204 – FGD, mothers-in-law, Rajshahi

205 Other fruits and vegetables which were not preferred for consumption were black  
206 eggplant, indian spinach, coconut and butternut squash as they possibly caused allergy,  
207 cold, asthma (*hapani*) in the newborns. A few participants also mentioned that drinking  
208 coconut water was not allowed as it can turn the baby’s eye color to red and/or opaque  
209 (*chok laal/ghola hoye jae*).

## 210 **Other food items**

211 Rice and its variations remain the staple food in all the meals consumed by the pregnant women.  
212 Yet, the intake of a few forms of rice were restricted during pregnancy. A few participants  
213 mentioned avoiding eating cooked rice soaked in water overnight (*panta bhaat*), as it was  
214 considered as a cold food which might lead the newborn catching a cold. Also, eating uncooked  
215 rice, puffed rice (*muri* and *khoi*) was not allowed as it is believed to cause insufficient breast  
216 milk production later on. Expecting mothers from Rajshahi also avoided eating puffed rice, rice  
217 crisps (*chira*) and fried rice powder (*chaatu*), because the elders believed, these foods when  
218 consumed will coat the body of the fetus with a very sticky greasy material which will be very  
219 hard to clean after the baby is born.

220 Consuming any cold food or drinks was barred for the pregnant women of Cumilla and Rajshahi  
221 as they believed cold foods will cause common cold of the baby. Additionally, women from  
222 Cumilla mentioned that drinking cold water just before delivery makes the delivery difficult as  
223 the baby gets stuck in the womb and cannot come out via normal vaginal delivery. In such cases  
224 the mother needs an episiotomy/caesarean section to deliver the baby, which was not favored.

225 “While I was pregnant, people told me to not eat cold foods... since I have asthma,  
226 I was afraid that drinking or eating cold foods will cause my child to have a  
227 cold...or worse... pneumonia...”- IDI, pregnant woman, Rajshahi

## 228 **Motivators for adhering with food taboos**

229 Many participants in this current study did realize that many reasons behind avoiding most of the  
230 tabooed foods were probably insignificant and had no scientific validity, but they still followed  
231 them out of fear for their perceived negative effects. Few of the reasons identified for adhering  
232 with the taboos included: preference for vaginal delivery for childbirth, to avoid the financial

233 burden of a caesarean section, to avoid causing any harm to their baby, and deep trust on their  
234 elders.

235 The preference for a normal vaginal delivery either at home or an institution was mentioned by  
236 majority of the participants. Despite knowing the importance of nutritious food for the baby's  
237 well-being, many participants avoided eating too much, fearing a large baby would lead to  
238 delivery complications and the need for a costly caesarean section. Conversely, some families  
239 encouraged more food intake, believing that a fuller stomach would limit space for the fetus to  
240 grow, making normal delivery easier and reducing the need for a caesarean section.

241 “The in-laws tell them if they eat more the baby will be bigger and it will take a  
242 caesarean section to deliver the baby, which they cannot afford to do. It is one of  
243 the major reasons for eating less...” – IDI, HCW, Rajshahi

244 “I try to eat more now, so that my belly remains full... everybody suggests me to  
245 eat more food so that the baby will remain small but also healthy... and I will not  
246 need caesarean section” – IDI, pregnant woman, Cumilla

247 Additionally, the participants wanted to avoid caesarean section or hospital delivery was due to  
248 the financial burden it would impose on the family, and the extended time it would take for a  
249 mother to recover also. Similar sentiments were also echoed by the husbands, where they  
250 explained, because of their meager earnings they could not afford caesarean birthing and hence,  
251 the expecting mothers complied with eating less amounts of food when told to. Additionally,  
252 another husband mentioned that, undergoing caesarean delivery might be a matter of  
253 embarrassment for the new mother, as during the postpartum period she is unable to contribute  
254 much to her household chores or family income.

255 “The mother is asked to eat less because, when the child gains more weight, it  
256 creates problems during the delivery... also, the woman usually works to earn for  
257 herself and her family. When the baby is born by cesarean birth, the mother  
258 cannot earn or do her daily chores like before. She then feels ashamed and keeps  
259 her head bowed down in front of the family.” – FGD, husbands, Habiganj

260 Another key reason for adhering to the taboos was the unwavering trust many participants placed  
261 in their family elders, particularly the female heads of the household, who were regarded as more  
262 knowledgeable and experienced due to their own experiences with childbirth.

263 “My mother-in-law gives me food that is good for me, and doesn't give those  
264 food that aren't good for me... I don't say anything else” – IDI, pregnant woman,  
265 Habiganj

266 Many HCWs also considered the blind faith the daughters-in-law had on their mothers or  
267 mothers-in-law as the prime reason for following the taboos.

268 “... still now in villages, the daughters-in-law have blind faith on their mothers-in-  
269 law... it's not blind faith ...it's like compulsion, despite of our counselling, they  
270 (pregnant women) say, I will do whatever my mother-in-law asked me to do!” –  
271 FGD, HCWs, Bhola

## 272 **Influencers for breaking the food taboos**

273 Even though food taboos are widely prevalent in rural communities, the interviews revealed that  
274 many pregnant mothers did not follow this cultural practice because they were not reinforced by  
275 their family members or community elders.

276 “I ate mutton several times during my pregnancy... many people told me that if I  
277 eat mutton a bad smell will come from my baby’s body after birth. But I ate it  
278 when I was pregnant with my eldest child, and nothing was wrong with my child  
279 after his birth...” - IDI, pregnant woman, Cumilla

280 Some mothers also pointed out that one of the reasons for breaking food taboos was that the baby  
281 or mother did not experience any of the adverse effects of the particular tabooed food, even after  
282 consuming them.

283 “During my first pregnancy, everyone forbade me to eat too much food...they used  
284 to say that if I eat too much food, the baby will get bigger and I will face difficulties  
285 during delivery...but I didn’t listen to them, I ate as much as I wished and delivered  
286 a healthy baby per vaginally” – IDI, pregnant woman, Rajshahi.

287 Many participants also highlighted the lack of enforcement to the adherence of taboos. This was  
288 because of the counselling by the HCWs to dispel many long standing food taboos, improved  
289 knowledge of the mother-in-law and husband regarding maternal nutritional, and raised  
290 educational level of the rural people. It was reported that:

291 “In our days we (elderly women) were only given bitter cumin paste or coriander  
292 paste to eat after our deliveries... it was meant to purify our bodies after the delivery  
293 of the baby ...then we had no idea about what to eat and what not to... now days  
294 the doctors (*field HCWs are called as doctors*) advise us. The old days are gone.  
295 Now we feed the expecting mother ducks, eggs, fish...”- FGD, mothers-in-law,  
296 Cumilla.

297 “Before the pregnant women were given rice husks (locally called as *chaff*) to eat...  
298 it was the rules of the society... the old people did not understand many things  
299 then... but now everybody is more aware... everybody wants the mother and the  
300 baby to be healthy... that’s why we listen and follow what the health worker tells  
301 us...” - FGD, husbands, Cumilla.

302 Nutrition focused counselling are usually provided to pregnant mothers by HCWs during their  
303 ante-natal visits at the health center, which is also supplemented with door-to-door household  
304 visits by domiciliary workers and by conducting yard meetings (*uthan boithok*). During these  
305 sessions, the mothers and their family members are informed about what to eat, how much to eat,  
306 and the impact it has on the mother’s and child’s health. These are aimed not only for improving  
307 the awareness regarding the nutritional needs of the mother, but the HCWs also aspire on  
308 abolishing the long standing food taboos in each region.

309 “...as we are providing healthcare related information, the bad culture of adhering  
310 to food taboos is mostly gone. Like before when they used to refrain their  
311 daughters-in-law against eating too much, but now because of us advising them  
312 they are providing proper food and care to their daughters-in-law.” – IDI, HCW,  
313 Bhola

314 The ability of the rural people to accept this new information which contradicts their preexisting  
315 beliefs on food taboos is influenced by the improved educational status of the expectant mother  
316 and her husband. Likewise, hearing and viewing health messages on the radio and television, as  
317 well as observing other people in similar situations.



318 “Before there were many misconceptions about food... but now they are being  
319 removed... because either the wife or the husband is educated... so when we tell  
320 them something, they understand it. The husband then shares the new knowledge  
321 with his parents, helps them to change their views. The times have changed ... the  
322 parents also listen to their kids now.” – IDI, HCW, Cumilla

323 “People said eating barb fish (*Puti maach*) and duck meat hinders production of  
324 breast milk after delivery. But I don't believe these and didn't follow them... you  
325 see, I am a school teacher... I teach students about nutritious food from the school's  
326 science book. I also suggest my neighbors to eat food like me. I tell them, those are  
327 nutritious food, and you should eat this food every day.” – IDI, pregnant woman,  
328 Habiganj

## 329 **Discussion**

330 This study aimed at exploring the existing food taboos in the rural areas of Bangladesh among  
331 the pregnant women, along with the influencers for either adhering or breaking the taboos. The  
332 results revealed that all pregnant participants were at least familiar with one food item which was  
333 tabooed during pregnancy. These beliefs are an integral part of the oral traditions of Bangladesh's  
334 rural communities, where elders pass on indigenous knowledge and beliefs from generation to  
335 generation [8]. Therefore, women already have developed detailed perceptions and belief  
336 systems related to pregnancy and childbirth, prior to antenatal care and nutrition education  
337 contact [4]. The current study findings indicate that various food items from animal source were  
338 most commonly avoided. Fishes like white carp, trout fish, zigzag eel, were not consumed in  
339 rural Bangladesh, as they were believed to cause increased movement of child/ convulsions and

340 fetal malformation. Correspondingly, in countries like Tanzania [9], Indonesia [10], and  
341 Malaysia [11], fishes like eel, catfish, shrimp, stingray, mackerel, shellfish, were tabooed  
342 because they were believed to cause difficulties during delivery. Meat like duck meat and  
343 mutton, were avoided by the participants of this present study as they were perceived to cause  
344 respiratory disorders of the baby. The consumption of meat, chicken and eggs during pregnancy  
345 was also found to be restricted in Indonesia [10], Nigeria [12,13] and South Africa [14], because  
346 the mothers believed the child maybe born disabled and develop bad habits. Other than protein  
347 foods, the most frequently tabooed food items identified in this study were pineapples and green  
348 papaya, which was perceived to cause miscarriage. These fruits were not only avoided in  
349 Bangladesh, but also in various parts of India and other Asian countries due to the fear of  
350 abortion [1,5,15,16]. On the other hand, in African countries, women cited oranges, mangoes,  
351 peaches, and other yellow/orange colored fruits as tabooed, as they believed that the baby would  
352 then be born jaundiced, a condition causing the newborn's skin and eyes to become yellow  
353 [14,17]. Most of the taboo foods reported in this study are rich sources of essential nutrients and  
354 micronutrients, which are crucial for maternal health and child development. Restricting these  
355 foods from the pregnant's food basket, limits their dietary diversity and leaves them vulnerable  
356 to many nutritional deficiencies during pregnancy, resulting in the potential detriment of both  
357 mother and the unborn child [14].

358 The participants' reasons for adhering to food taboos in this study were, not wanting to harm  
359 their baby, preference for vaginal delivery as the birthing process, and blind faith on their elders.  
360 These reasons were also cited in previous studies done in Bangladesh [4,5,18] and India (West  
361 Bengal) [1]. The pregnant also mentioned that, although some of the reasons for food taboos  
362 were trivial and sometimes based on mere speculations, they still uphold them for fear of their

363 perceived repercussions. Similar reasons for adhering with food taboos was also reported by  
364 Arzoaquoi et al. (2015) [2] and Haslam, Lawrence, & Haefeli (2003) [19], where the participants  
365 were aware of the reasons for adhering to the taboos, and such practice was observed as positive  
366 antenatal health behaviors within the community favoring positive pregnancy outcomes. Among  
367 other reasons quoted were, a symbol of respect for elders [2,17], mother's own previous bad  
368 experience or of others [10], maintaining harmony with entities, natural and supernatural [20],  
369 preventing any misfortunes or calamity from happening [19], avoid being excommunicated from  
370 their own family or community, and sustaining a feeling of belonging or cohesion with their  
371 community and cultural values [2].

372 Despite of the prevalence of food taboos in the rural communities in Bangladesh, this study was  
373 able to button down participants who did not follow any food taboos. A notable reason behind  
374 breaking this cultural practice was the improved knowledge of the mothers-in-law and husbands  
375 on maternal nutrition, which in turn led to reduced reinforcement of the taboos on the pregnant  
376 mother by her family members. Likewise, experiencing no adverse effects upon consuming the  
377 tabooed food items, and higher educational level of the rural people, enabled the mothers to  
378 break the existing culture of taboos. These findings are one-of-a-kind, because previous studies  
379 from Bangladesh only informed the existing food taboos and adherence to them [1,4,5,21]. Only  
380 one study reported the lack of adherence to food taboos, because of the increased knowledge of  
381 healthy eating during pregnancy and gendered empowerment of women residing in an urban  
382 slum of Bangladesh [18]. In rural areas, there are numerous ongoing programs emphasizing on  
383 nutrition-sensitivity to improve the nutritional status of pregnant women. Among these are  
384 counselling sessions which are important tools to break food taboos, because they equip the  
385 individuals with the knowledge about the nutritional value of different foods, dispel myths and

386 misconceptions, and helps to create an enabling environment to support the woman's changed  
387 dietary behavior [22,23]. Additionally, an increase in education levels in rural communities has  
388 probably led to the questioning of traditional practices and belief, and to seek out information  
389 and advice from healthcare professionals. These in particular have resulted in the reduction of  
390 the enforcement of food taboos by the family/community members, and an increase in the uptake  
391 of ante-natal care services [24], which can give pregnant women more freedom and assurance to  
392 make their own food choices, including food items that were previously considered taboo. The  
393 results from this study might be useful while developing strategies to encourage dissent towards  
394 the food taboos, by utilizing scientific evidence to dispel cultural or religious prohibitions against  
395 the tabooed items. Furthermore, the findings can be integrated in the existing community-based  
396 nutritional programs as an effort to create more awareness. In conjunction to these, mechanisms  
397 can be placed to routinely identify women observing food taboos, assessing the reasons and  
398 provide innovative means to minimize their negative and maximize their positive nutritional  
399 effects [24].

400 Among the limitations of this study, the findings are based on self-reported maternal dietary  
401 patterns, thus recall bias and social desirability bias may have been present. Although the  
402 intention of this study was to collect and validate data via participant observation, due to  
403 resource limitations, this was not feasible. We are convinced that the findings reflect actual  
404 practices, given the consistency of the results across the qualitative interviews and the previous  
405 studies discussed.

## 406 **Conclusions**

407 This study revealed the existence and practice of food taboos during pregnancy, which varied  
408 across the different geographical groups in rural Bangladesh. All the participants were familiar  
409 with at least one tabooed food item and were motivated to comply with the taboos because of  
410 their desire to protect their unborn child, preference for vaginal delivery, and a sense of profound  
411 respect for their elders. On the other hand, nutritional counseling, increased nutritional  
412 knowledge of the pregnant women and her family members, reduced reinforcement of taboos,  
413 and lack of negative consequences from consuming tabooed foods, enabled the mothers to  
414 breaking off the food taboos. It is important to note that breaking a cultural or religious practice  
415 can be a difficult decision and not everyone may follow this route. However, it is important to  
416 provide a preliminary set of recommendations based on the study findings to address public  
417 health problems related to adherence to food taboos and promote healthy lifestyles.

## 418 **Acknowledgements**

419 The authors would like to acknowledge the support of the team from Nutrition International for  
420 all their technical and administrative support. The authors would also like to thank all the  
421 participants for their valuable time and assistance in sharing their views for this study.

## 422 **References**

- 423 1. Chakrabarti S, Chakrabarti A. Food taboos in pregnancy and early lactation among women  
424 living in a rural area of West Bengal. *Journal of Family Medicine and Primary Care*.  
425 2019;8: 86. doi:10.4103/jfmpe.jfmpe\_53\_17
- 426 2. Arzoaquoi SK, Essuman EE, Gbagbo FY, Tenkorang EY, Soyiri I, Laar AK. Motivations for  
427 food prohibitions during pregnancy and their enforcement mechanisms in a rural Ghanaian  
428 district. *Journal of Ethnobiology and Ethnomedicine*. 2015;11: 59. doi:10.1186/s13002-  
429 015-0044-0

- 430 3. Wahid MA, Fathi SAH. Nutrition and the unborn baby. *Ricerca in clinica e in laboratorio*.  
431 1987;17: 199–206.
- 432 4. Shannon K, Mahmud Z, Asfia A, Ali M. The Social and Environmental Factors Underlying  
433 Maternal Malnutrition in Rural Bangladesh: Implications for Reproductive Health and  
434 Nutrition Programs. *Health Care for Women International*. 2008;29: 826–840.  
435 doi:10.1080/07399330802269493
- 436 5. Munni US, Hossain S, Ahmed KR. Nutritional beliefs and practices among diabetic pregnant  
437 mothers in a tertiary care hospital in Bangladesh. *Diabetes & Metabolic Syndrome: Clinical  
438 Research & Reviews*. 2017;11: 287–290. doi:10.1016/j.dsx.2016.12.015
- 439 6. How Many Interviews Are Enough?: An Experiment with Data Saturation and Variability -  
440 Greg Guest, Arwen Bunce, Laura Johnson, 2006. [cited 29 Aug 2021]. Available:  
441 <https://journals.sagepub.com/doi/abs/10.1177/1525822x05279903>
- 442 7. Braun V, Clarke V. Using thematic analysis in psychology. *Qualitative Research in  
443 Psychology*. 2006;3: 77–101. doi:10.1191/1478088706qp063oa
- 444 8. Hossain Z, Choudhury AF. Folk dietary practices and ethnophysiology of pregnant women  
445 in rural Bangladesh. *Women in International Development*, Michigan State University;  
446 1987.
- 447 9. Marchant T, Armstrong Schellenberg JRM, Edgar T, Ronsmans C, Nathan R, Abdulla S, et  
448 al. Anaemia during pregnancy in southern Tanzania. *Ann Trop Med Parasitol*. 2002;96:  
449 477–487. doi:10.1179/000349802125001221
- 450 10. Hartini TNS, Padmawati RS, Lindholm L, Surjono A, Winkvist A. The importance of eating  
451 rice: changing food habits among pregnant Indonesian women during the economic crisis.  
452 *Social science & medicine*. 2005;61: 199–210.
- 453 11. SA SZ, Nilan P, Germov J. Food restrictions during pregnancy among Indigenous Temiar  
454 women in peninsular Malaysia. *Malaysian journal of nutrition*. 2012;18.
- 455 12. Ekwochi U, Osuorah CD, Ndu IK, Ifediora C, Asinobi IN, Eke CB. Food taboos and myths  
456 in South Eastern Nigeria: The belief and practice of mothers in the region. *Journal of  
457 ethnobiology and ethnomedicine*. 2016;12: 1–6.
- 458 13. Ugwa E. Nutritional practices and taboos among pregnant women attending antenatal care at  
459 general hospital in Kano, Northwest Nigeria. *Annals of medical and health sciences  
460 research*. 2016;6: 109–114.
- 461 14. Chakona G, Shackleton C. Food Taboos and Cultural Beliefs Influence Food Choice and  
462 Dietary Preferences among Pregnant Women in the Eastern Cape, South Africa. *Nutrients*.  
463 2019;11: 2668. doi:10.3390/nu11112668
- 464 15. Iradukunda F. Food taboos during pregnancy. *Health Care Women Int*. 2020;41: 159–168.  
465 doi:10.1080/07399332.2019.1574799

- 466 16. Shwetha T, Shwetha R, Krishna I, Usha R. Food taboos among pregnant and lactating  
467 mothers in Tumkur: a qualitative study. *International Journal of Community, Medicine and*  
468 *Public Health*. 2017;4: 1060–1065.
- 469 17. Ramulondi M, de Wet H, Ntuli NR. Traditional food taboos and practices during pregnancy,  
470 postpartum recovery, and infant care of Zulu women in northern KwaZulu-Natal. *Journal of*  
471 *Ethnobiology and Ethnomedicine*. 2021;17: 15. doi:10.1186/s13002-021-00451-2
- 472 18. Levay AV, Mumtaz Z, Faiz Rashid S, Willows N. Influence of gender roles and rising food  
473 prices on poor, pregnant women’s eating and food provisioning practices in Dhaka,  
474 Bangladesh. *Reproductive Health*. 2013;10: 53. doi:10.1186/1742-4755-10-53
- 475 19. Haslam C, Lawrence W, Haefeli K. Intention to breastfeed and other important health-related  
476 behaviour and beliefs during pregnancy. *Family Practice*. 2003;20: 528–530.
- 477 20. Bolton JM. Food taboos among the Orang Asli in West Malaysia: a potential nutritional  
478 hazard. *The American Journal of Clinical Nutrition*. 1972;25: 789–799.
- 479 21. Begum R, Hussain MA, Abdullah M, Ahmad K. Study of food habits, food practices and  
480 taboos in Bangladesh: their implications in nutrition education. *Bangladesh Med Res Counc*  
481 *Bull*. 1979;5: 1–13.
- 482 22. Chowdhury M, Raynes-Greenow C, Kelly P, Alam NA, Afsana K, Billah SM, et al. The  
483 Impact of Antenatal Balanced Plate Nutrition Education for Pregnant Women on Birth  
484 Weight: A Cluster Randomised Controlled Trial in Rural Bangladesh. *Nutrients*. 2022;14:  
485 4687. doi:10.3390/nu14214687
- 486 23. Sanghvi T, Haque R, Roy S, Afsana K, Seidel R, Islam S, et al. Achieving behaviour change  
487 at scale: Alive & Thrive’s infant and young child feeding programme in Bangladesh.  
488 *Maternal & child nutrition*. 2016;12: 141–154.
- 489 24. Biza N. Food Taboos and Misconceptions Among Pregnant Women of Shashemene District,  
490 Ethiopia, 2012. *Science Journal of Public Health*. 2015;3: 410.  
491 doi:10.11648/j.sjph.20150303.27

492

493
